# Supplementary material for: Amniotic fluid biomarkers predict the severity of congenital cytomegalovirus infection
Source: J Clin Invest. 2022 Jun 1;132(11):e157415. doi: 10.1172/JCI157415 (PMC9151692; doi:10.1172/JCI157415)
Supplement: Supplemental data [file jci-132-157415-s188.pdf]

## **SUPPLEMENTAL MATERIAL**

### **Methods**

#### Patient cohorts

Proteome analysis was carried out in a Discovery cohort, which included amniotic fluid samples of six fetuses with severe cCMV and eight asymptomatic CMV-infected fetuses, and ten uninfected fetuses, retrieved from the databases of the Hadassah Medical Center Clinical Virology Laboratory (Hadassah lab) (Figure 1, Supplementary Table 1). Validation of selected biomarkers (by specific immunoassays) was carried out in two stages: 1) Using an Initial Validation cohort of 11 fetuses with severe cCMV and 15 asymptomatic CMV-infected fetuses, and eight uninfected fetuses; This cohort, aimed to confirm the proteomics finding by ELISA and to define the proteins' primary cutoff levels for predictive assessment, included available samples (for which sufficient amount of material was available) from the Discovery cohort and additional unrelated samples retrieved from the Hadassah lab (Figure 1, Supplementary Table 1, and Supplementary Table 4). 2) An unrelated clinically-blinded (Blind)-Testing cohort of ten fetuses with severe cCMV and 19 asymptomatic CMV-infected fetuses, and 19 uninfected fetuses from the Fondazione IRCCS Policlinico San Matteo Virology Laboratory, Pavia, Italy (San Matteo lab), and the Maccabi Healthcare Services Central Laboratory, Rehovot, Israel (Maccabi lab) (Supplementary Table 4). Together, the 62 samples not included in the Discovery cohort (17 severe cCMV; 26 asymptomatic cCMV; 19 uninfected) constituted an Independent Validation cohort (Figure 1, and Supplementary Table 4). The predicted classification of this cohort (severe versus asymptomatic), based on the detected biomarker levels, were first blindly defined and submitted by the Hadassah lab investigators, and the biomarkers predictive values were subsequently calculated following retrospective disclosure of the infection classification data by the San Matteo and Maccabi lab investigators.

### CMV DNA load analysis by RT-qPCR

DNA was extracted from 200 microliters of amniotic fluid samples yielding 50 microliters of eluted DNA, using MagnaPure (Roche Life Science, Indianapolis, IN). Viral DNA load (genome copies/ml) was determined by quantitative RT-PCR assay as previously described, with the use of primers and probes derived from the CMV glycoprotein B (for quantitation) and immediate early genes (28). The assay demonstrated a linear quantitation over a 6-log range with a sensitivity of 50 copies/ml.

### Sample preparation, liquid chromatography-Mass Spectrometry, and data processing

*Sample preparation:* Amniotic fluid (150  $\mu$ L) was concentrated to 50  $\mu$ L using a 3 kDa MWCO filter (Amicon Ultracel-3K, Merck Millipore, Cork, Ireland). The concentrated fluid was loaded onto a serum depletion column (Multiple affinity removal column, 4.6x100 mm, Hu-14, Agilent) connected to a HPLC (1260 Infinity II Bio-Inert LC System, Agilent). After purging the system with buffers A and B, the depletion column was equilibrated in buffer A for 10 min at a flow rate of 1 mL/min at room temperature. The sample was loaded onto the column and the system was kept at 100% buffer A at a flow rate of 0.125 mL/min for 8 min, and then increased to 1 mL/min for another 2 min. The buffer was changed to 100% B at the same flow rate and kept for 18 min. The depleted fraction was collected at 5 to 15 min and underwent buffer exchange to 50  $\mu$ L of 50 mM ammonium bicarbonate at a 1mg/ml concentration. Proteins were reduced with 5 mM dithiothreitol (Sigma) for 1 hr at room temperature, and alkylated with 10 mM iodoacetamide (Sigma) in the dark for 45 min at room temperature. Samples were diluted to 2 M urea with 50 mM ammonium bicarbonate. Proteins were then subjected to digestion with trypsin (Promega; Madison, WI, USA) overnight at 37°C at 50:1 protein:trypsin ratio, followed by a second trypsin digestion for 4 hr. The digestions were stopped by addition of trifluoroacetic acid (1% final

concentration). Following digestion, peptides were desalted using Oasis HLB,  $\mu$ Elution format (Waters, Milford, MA, USA). The samples were vacuum dried and stored in  $-80^{\circ}\text{C}$  until further analysis.

*Liquid chromatography:* ULC/MS grade solvents were used for all chromatographic steps. Each sample was loaded using split-less nano-Ultra Performance Liquid Chromatography (10 kpsi nanoAcquity; Waters, Milford, MA, USA). The mobile phase was: A)  $\text{H}_2\text{O}$  + 0.1% formic acid and B) acetonitrile + 0.1% formic acid. Desalting of the samples was performed online using a reversed-phase Symmetry C18 trapping column (180  $\mu\text{m}$  internal diameter, 20 mm length, 5  $\mu\text{m}$  particle size; Waters). The peptides were then separated using a T3 HSS nano-column (75  $\mu\text{m}$  internal diameter, 250 mm length, 1.8  $\mu\text{m}$  particle size; Waters) at 0.35  $\mu\text{L}/\text{min}$ . Peptides were eluted from the column into the mass spectrometer using the following gradient: 4% to 25%B in 155 min, 25% to 90%B in 5 min, maintained at 90% for 5 min and then back to initial conditions.

*Mass Spectrometry:* The nanoUPLC was coupled online through a nanoESI emitter (10  $\mu\text{m}$  tip; New Objective; Woburn, MA, USA) to a quadrupole orbitrap mass spectrometer (Q Exactive HFX, Thermo Scientific) using a Flexlon nanospray apparatus (Proxeon). Data was acquired in data dependent acquisition (DDA) mode, using a Top10 method. MS1 resolution was set to 120,000 (at 400m/z), mass range of 375-1650 m/z, AGC of  $3\text{e}6$  and maximum injection time was set to 60 msec. MS2 resolution was set to 15,000, quadrupole isolation 1.7 m/z, AGC of  $1\text{e}5$ , dynamic exclusion of 40 sec and maximum injection time of 60 msec.

*Data processing:* Raw data was processed with MaxQuant v1.6.0.16. The data was searched with the Andromeda search engine against the human and HCMV proteome databases appended with common lab protein contaminants and the following modifications: Carbamidomethylation of C as a fixed modification and oxidation of M, deamidation of N and Q and protein N-terminal acetylation as variable ones. MBR was

enabled and Label-Free Quantification (LFQ) min. ratio count was set to one. The rest of the parameters were kept as default. The LFQ intensities were extracted and used for further calculations using Perseus v1.6.0.7. Decoy hits were filtered out, as well as proteins that were identified on the basis of a modified peptide only and GO annotations added. The LFQ intensities were log transformed and only proteins that had at least three valid values in at least one experimental group were kept. The remaining missing values were randomly imputed. The t-test was performed to identify significant differential protein expression between the groups, and a p-value of 0.05 or less was considered statistically significant. To be defined as a differential protein expression we also required a minimal fold-change of  $> 1.5$  between the groups.

The mass spectrometry proteomics data have been deposited to the ProteomeXchange Consortium via the PRIDE partner repository with the dataset identifier PXD029105.

A.

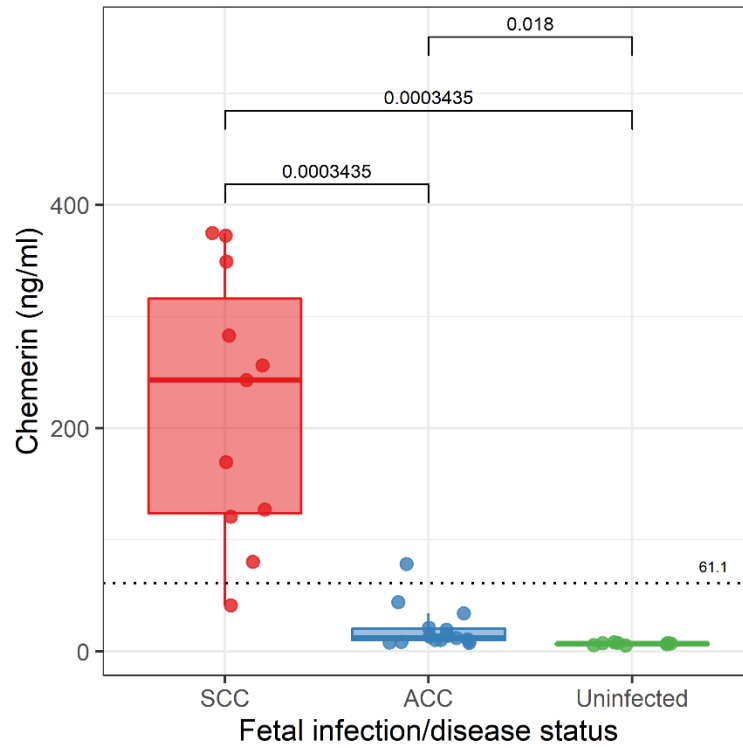

B.

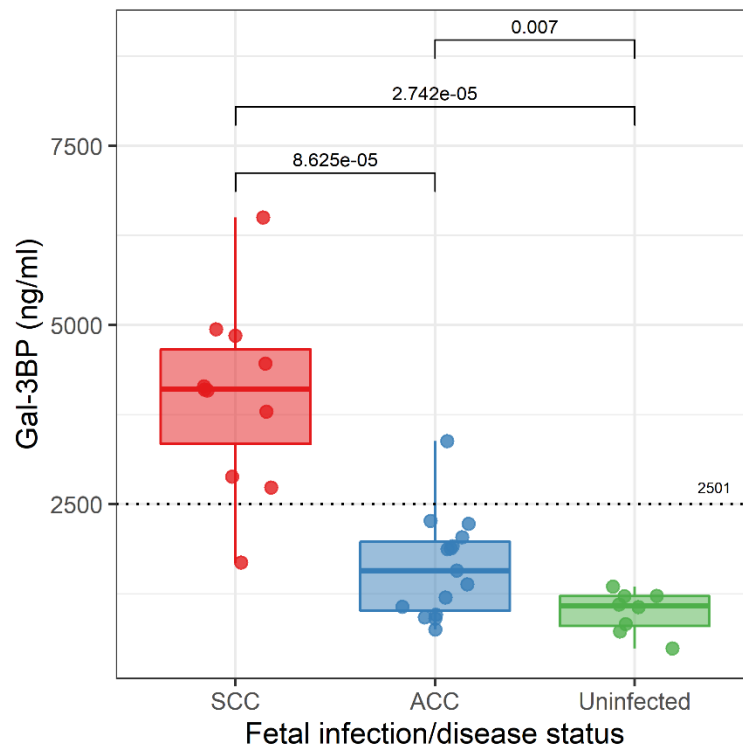

**Figure S1. Amniotic fluid chemerin (A) and Gal-3BP (B) levels in an Initial Validation cohort of fetuses with severe cCMV (SCC; n=11), asymptomatic cCMV (ACC; n=15), and in uninfected fetuses (n=8).**

The dotted horizontal lines represent optimal predictive cutoff values derived by ROC analysis. The figures were generated with the R ggplot2 package (version 3.1.0). Boxplots were generated with geom\_boxplot default parameters, such that the box represents 25-75 percentile, and the whiskers from the box to the largest/smallest value no further than  $1.5 * \text{IQR}$  from the box (where IQR is the inter-quartile range, or distance between the first and third quartiles). P-values were calculated by Bonferroni correction for multiple comparisons.

A.

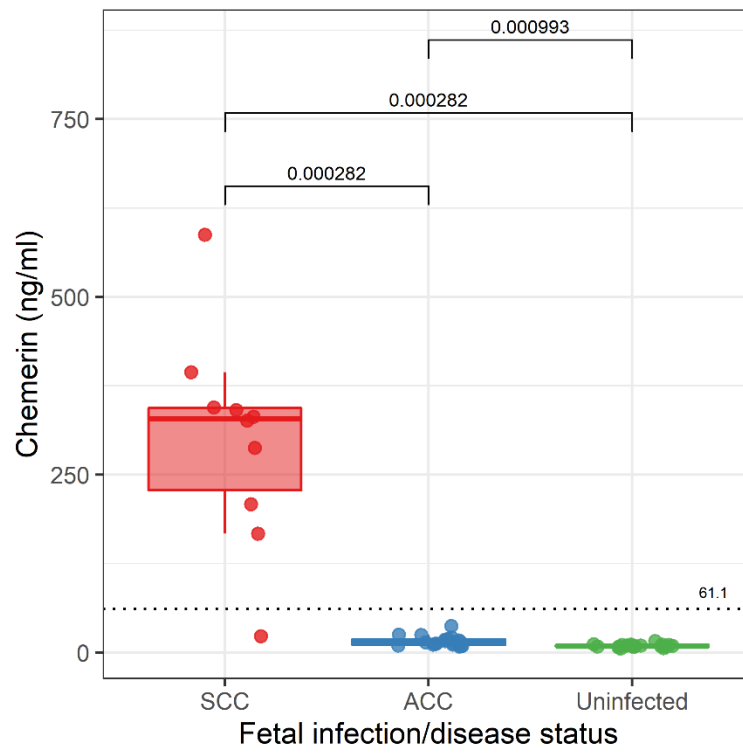

B.

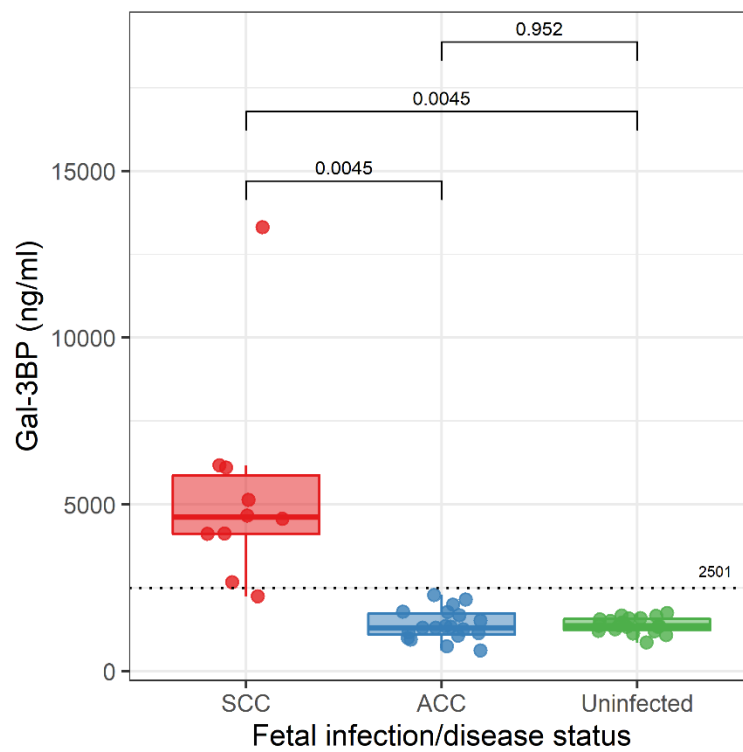

**Figure S2. Amniotic fluid chemerin (A) and Gal-3BP (B) levels in a Blind-Testing cohort of fetuses with severe cCMV (SCC; n=10), asymptomatic cCMV (ACC; n=19), and in uninfected fetuses (n=19).**

The dotted horizontal lines represent optimal predictive cutoff values derived by ROC analysis from an unrelated Initial Validation cohort. The figures were generated with the R ggplot2 package (version 3.1.0). Boxplots were generated with geom\_boxplot default parameters, such that the box represents 25-75 percentile, and the whiskers from the box to the largest/smallest value no further than  $1.5 * \text{IQR}$  from the box (where IQR is the inter-quartile range, or distance between the first and third quartiles). P-values were calculated by Bonferroni correction for multiple comparisons.

**Table S1. Prenatal imaging data, outcome, infection severity classification, and amniotic fluid analyses in CMV-infected cases included in the Discovery cohort**

| Case no. | Imaging findings                                                                                                          | Gestational age at amniocentesis (weeks) | Gestational age at appearance of severe imaging findings (weeks) | Pregnancy outcome | Postnatal follow-up (months) | cCMV severity classification | Proteome analysis | ELISA validation of specific biomarkers |
|----------|---------------------------------------------------------------------------------------------------------------------------|------------------------------------------|------------------------------------------------------------------|-------------------|------------------------------|------------------------------|-------------------|-----------------------------------------|
| 98       | US - hydrops (ascites, pericardial effusion, cardiomegaly)                                                                | 21                                       | 22                                                               | TOP               | NA                           | SCC                          | +                 | +                                       |
| 212      | US - hyperechogenic ventricular wall, cortical and thalamic calcifications                                                | 21                                       | 22                                                               | TOP               | NA                           | SCC                          | +                 | +                                       |
| 30       | US - cortical calcifications, ventriculomegaly > 15mm, agenesis of corpus callosum, hyperechogenic bowel                  | 23                                       | 27                                                               | TOP               | NA                           | SCC                          | +                 | +                                       |
| 911      | US - polymicrogyria, head circumference < 2 SD of normal; MRI - polymicrogyria, microcephaly, white matter cystic lesions | 22                                       | 31                                                               | TOP               | NA                           | SCC                          | +                 | +                                       |
| 302      | US - temporal cysts; MRI - temporal cysts                                                                                 | 22                                       | 33                                                               | TOP               | NA                           | SCC                          | +                 | -                                       |
| 946      | US – head circumference < 2 SD of normal, hyperechogenic bowel                                                            | 22                                       | 22                                                               | TOP               | NA                           | SCC                          | +                 | -                                       |
| 957      | normal                                                                                                                    | 22                                       | NA                                                               | Delivery          | >24                          | ACC                          | +                 | +                                       |
| 337      | normal                                                                                                                    | 22                                       | NA                                                               | Delivery          | >24                          | ACC                          | +                 | +                                       |
| 255      | normal                                                                                                                    | 23                                       | NA                                                               | Delivery          | >48                          | ACC                          | +                 | +                                       |
| 702      | normal                                                                                                                    | 22                                       | NA                                                               | Delivery          | >24                          | ACC                          | +                 | +                                       |
| 130      | normal                                                                                                                    | 21                                       | NA                                                               | Delivery          | >24                          | ACC                          | +                 | +                                       |
| 740      | normal                                                                                                                    | 23                                       | NA                                                               | Delivery          | >48                          | ACC                          | +                 | +                                       |
| 164      | normal                                                                                                                    | 23                                       | NA                                                               | Delivery          | >48                          | ACC                          | +                 | +                                       |
| 722      | normal                                                                                                                    | 23                                       | NA                                                               | Delivery          | >36                          | ACC                          | +                 | +                                       |

US = ultrasound; MRI = magnetic resonance imaging; SD = standard deviations; IUGR = intrauterine growth restriction; TOP = termination of pregnancy; NA = not applicable; cCMV = congenital cytomegalovirus; SCC = severe congenital CMV infection; ACC = asymptomatic congenital CMV infection

**Table S2. Amniotic fluid proteins differentially-excreted between CMV-infected (n=14) and uninfected (n=10) fetuses**

| Protein                                                                                  | Gene Symbol | Protein ID (Accession number)        | p value | Fold-Change |
|------------------------------------------------------------------------------------------|-------------|--------------------------------------|---------|-------------|
| Epiphycan                                                                                | EPYC        | Q99645                               | <0.0001 | 9.1         |
| Carbonic anhydrase 3                                                                     | CA3         | P07451                               | <0.01   | 7.1         |
| Retinoic acid receptor responder 2 (Chemerin)                                            | RARRES2     | Q99969                               | <0.01   | 6.7         |
| Signal-regulatory protein beta-1                                                         | SIRPB1      | O00241                               | <0.0001 | 5.9         |
| Bone marrow stromal antigen 2                                                            | BST2        | Q10589                               | 0.01    | 3.0         |
| BPI fold-containing family B member 4                                                    | BPIFB4      | P59827                               | 0.02    | 2.9         |
| Ubiquitin-like protein ISG15                                                             | ISG15       | P05161                               | 0.01    | 2.8         |
| HLA class I histocompatibility antigen, Cw-2 alpha chain                                 | HLA-C       | P30501                               | <0.01   | 2.7         |
| Glycoprotein nmb                                                                         | GNPMB       | Q14956                               | 0.01    | 2.7         |
| Keratin, type II cytoskeletal 6A                                                         | KRT6A       | CON_P02538;<br>P02538;<br>CON_P50446 | 0.02    | 2.6         |
| Dickkopf-related protein 1                                                               | DKK1        | O94907                               | 0.04    | 2.4         |
| Fatty acid-binding protein, heart                                                        | FABP3       | P05413                               | <0.01   | 2.4         |
| ATP synthase subunit beta, mitochondrial                                                 | ATP5B       | P06576                               | 0.02    | 2.4         |
| CD5 antigen-like                                                                         | CD5L        | O43866                               | 0.04    | 2.4         |
| Secreted and transmembrane protein 1                                                     | SECTM1      | Q8WVN6                               | <0.0001 | 2.2         |
| SH3 domain-binding glutamic acid-rich-like protein                                       | SH3BGRL     | O75368                               | <0.01   | 2.0         |
| Carboxypeptidase Q                                                                       | CPQ         | Q9Y646                               | <0.01   | 2.0         |
| Protein S100-A6                                                                          | S100A6      | P06703                               | 0.01    | 2.0         |
| Coagulation factor V; Coagulation factor V heavy chain; Coagulation factor V light chain | F5          | P12259                               | 0.02    | 2.0         |
| Desmin                                                                                   | DES         | P17661                               | 0.02    | 2.0         |
| Transmembrane emp24 domain-containing protein 7                                          | TMED7       | Q9Y3B3                               | 0.03    | 2.0         |
| Chitotriosidase-1                                                                        | CHIT1       | Q13231                               | 0.03    | 2.0         |
| Collagen alpha-1(IX) chain                                                               | COL9A1      | P20849                               | 0.02    | 1.9         |
| Immunoglobulin J chain                                                                   | IGJ         | P01591                               | 0.05    | 1.8         |
| Galectin-3-binding-protein (Gal-3BP)                                                     | LGALS3BP    | Q08380                               | 0.03    | 1.7         |
| Receptor-type tyrosine-protein phosphatase S                                             | PTPRS       | Q13332                               | 0.02    | 1.7         |
| Cellular retinoic acid-binding protein 2                                                 | CRABP2      | P29373                               | 0.04    | 1.7         |
| Cathepsin B; Cathepsin B light chain; Cathepsin B heavy chain                            | CTSB        | P07858                               | <0.0001 | 1.7         |
| Laminin subunit alpha-5                                                                  | LAMA5       | O15230                               | 0.02    | 1.6         |
| Acidic leucine-rich nuclear phosphoprotein 32 family member A                            | ANP32A      | P39687                               | 0.04    | 1.6         |
| Apoptosis-associated speck-like protein containing a CARD                                | PYCARD      | Q9ULZ3                               | 0.04    | 1.6         |
| Low affinity immunoglobulin gamma Fc region receptor III-A                               | FCGR3A      | P08637                               | 0.04    | 1.6         |
| Beta-2-microglobulin; Beta-2-microglobulin form pl 5.3                                   | B2M         | P61769                               | <0.0001 | 1.5         |
| Cartilage acidic protein 1                                                               | CRTAC1      | Q9NQ79                               | 0.02    | 1.5         |

|                                                                                                     |            |        |       |      |
|-----------------------------------------------------------------------------------------------------|------------|--------|-------|------|
| Pappalysin-2                                                                                        | PAPPA2     | Q9BXP8 | 0.03  | -1.5 |
| WAP four-disulfide core domain protein 2                                                            | WFDC2      | Q14508 | 0.05  | -1.5 |
| Collagen alpha-2(I) chain                                                                           | COL1A2     | P08123 | 0.02  | -1.5 |
| Vascular endothelial growth factor receptor 1                                                       | FLT1       | P17948 | 0.03  | -1.6 |
| Lipolysis-stimulated lipoprotein receptor                                                           | LSR        | Q86X29 | 0.01  | -1.6 |
| Kin of IRRE-like protein 1                                                                          | KIRREL     | Q96J84 | 0.05  | -1.7 |
| Collagen alpha-1(III) chain                                                                         | COL3A1     | P02461 | 0.01  | -1.7 |
| Palmitoleoyl-protein carboxylesterase NOTUM                                                         | NOTUM      | Q6P988 | 0.03  | -1.7 |
| Insulin-like growth factor-binding protein 5                                                        | IGFBP5     | P24593 | 0.01  | -1.7 |
| Isthmin-2                                                                                           | ISM2       | Q6H9L7 | 0.03  | -1.7 |
| Glia-derived nexin                                                                                  | SERPINE2   | P07093 | 0.03  | -1.8 |
| Protein HEG homolog 1                                                                               | HEG1       | Q9ULI3 | 0.04  | -1.8 |
| Bone marrow proteoglycan; Eosinophil granule major basic protein                                    | PRG2       | P13727 | 0.02  | -1.8 |
| Endogenous retrovirus group MER34 member 1 Env polyprotein                                          | ERVMER34-1 | Q9H9K5 | 0.02  | -1.8 |
| Aspartate aminotransferase, cytoplasmic                                                             | GOT1       | P17174 | 0.02  | -2.0 |
| Amiloride-sensitive amine oxidase [copper-containing]                                               | AOC1       | P19801 | 0.02  | -2.0 |
| Serine protease 23                                                                                  | PRSS23     | O95084 | 0.04  | -2.1 |
| Angiopoietin-related protein 6                                                                      | ANGPTL6    | Q8NI99 | 0.04  | -2.1 |
| Alpha-1,6-mannosylglycoprotein 6-beta-N-acetylglucosaminyltransferase A                             | MGAT5      | Q09328 | 0.05  | -2.2 |
| Radixin                                                                                             | RDX        | P35241 | <0.01 | -2.4 |
| Protocadherin Fat 4                                                                                 | FAT4       | Q6V0I7 | <0.01 | -2.6 |
| N-acetylgalactosaminyltransferase 7                                                                 | GALNT7     | Q86SF2 | 0.01  | -2.6 |
| Immunoglobulin superfamily member 1                                                                 | IGSF1      | Q8N6C5 | 0.03  | -2.6 |
| Latrophilin-2                                                                                       | LPHN2      | O95490 | 0.01  | -2.7 |
| Hepatocyte growth factor; Hepatocyte growth factor alpha chain; Hepatocyte growth factor beta chain | HGF        | P14210 | <0.01 | -4.0 |

Included in the table are proteins differentially-excreted by > 1.5-fold

(-) before the fold-change value indicates decreased expression

The upper and lower bold horizontal lines mark proteins (shown above the upper line and below the lower line) differentially-excreted by > 2-fold

**Table S3. Amniotic fluid proteins differentially-excreted between fetuses with severe (n=6) and asymptomatic (n=8) cCMV**

| Protein                                                                 | Gene Symbol | Protein ID (Accession number)     | p value | Fold-Change |
|-------------------------------------------------------------------------|-------------|-----------------------------------|---------|-------------|
| Spectrin repeat containing nuclear envelope protein 1                   | SYNE1       | Q8NF91                            | 0.01    | 8.7         |
| Sarboxypeptidase A2                                                     | CPA2        | P48052                            | 0.05    | 5.3         |
| Retinoic acid receptor responder 2 (Chemerin)                           | RARRES2     | Q99969                            | 0.04    | 3.6         |
| Glutathione S-transferase theta-1                                       | GSTT1       | P30711                            | 0.04    | 3.0         |
| C-reactive protein                                                      | CRP         | P02741                            | 0.05    | 2.5         |
| Glycoprotein nmb                                                        | GPNMB       | Q14956                            | 0.03    | 2.5         |
| Galectin-3-binding-protein                                              | LGALS3BP    | Q08380                            | 0.02    | 2.4         |
| Myosin heavy chain 14                                                   | MYH14       | Q7Z406                            | 0.03    | 2.1         |
| Secretoglobulin family 3A member 2                                      | SCGB3A2     | Q96PL1                            | 0.06    | 2.1         |
| Carboxypeptidase Q                                                      | CPQ         | Q9Y646                            | 0.05    | 1.7         |
| Protein FAM3D (Family with sequence similarity 3 member D)              | FAM3D       | Q96BQ1                            | 0.03    | 1.7         |
| Keratin 17                                                              | KRT17       | CON__Q04695;<br>Q04695            | 0.04    | 1.7         |
| Platelet derived growth factor receptor beta                            | PDGFRB      | P09619                            | 0.05    | -1.5        |
| ADAM metalloproteinase domain 9                                         | ADAM9       | Q13443                            | 0.02    | -1.5        |
| Mesothelin; Megakaryocyte-potentiating factor; Mesothelin, cleaved form | MSLN        | Q13421                            | 0.05    | -1.5        |
| Sarcoglycan epsilon                                                     | SGCE        | O43556                            | <0.01   | -1.5        |
| Growth arrest specific 1                                                | GAS1        | P54826                            | 0.02    | -1.6        |
| Cell growth regulator with EF hand domain protein 1                     | CGREF1      | Q99674                            | 0.04    | -1.6        |
| Endoplasmic reticulum aminopeptidase 1                                  | ERAP1       | Q9NZ08                            | 0.01    | -1.9        |
| Glycoprotein Ib platelet subunit alpha                                  | GP1BA       | P07359                            | 0.02    | -2.1        |
| Actin alpha 1, skeletal muscle                                          | ACTA1       | P68133; P68032;<br>P63267; P62736 | 0.05    | -2.1        |
| Alcohol dehydrogenase [NADP(+)]                                         | AKR1A1      | P14550                            | 0.01    | -2.5        |
| Neurofascin                                                             | NFASC       | O94856                            | 0.04    | -2.6        |
| Chromogranin B                                                          | CHGB        | P05060                            | 0.03    | -3.0        |
| Pro-platelet basic protein                                              | PPBP        | P02775                            | 0.01    | -3.1        |
| Lysosome-associated membrane glycoprotein 2                             | LAMP2       | P13473                            | 0.05    | -3.3        |
| Maltase-glucoamylase                                                    | MGAM        | O43451                            | 0.02    | -3.6        |
| Heat shock protein beta-1                                               | HSPB1       | P04792                            | 0.04    | -3.7        |
| Angiopoietin like 6                                                     | ANGPTL6     | Q8NI99                            | <0.01   | -4.0        |

Included in the table are proteins differentially-excreted by > 1.5-fold

(-) before the fold-change value indicates decreased expression

The upper and lower bold horizontal lines mark proteins (shown above the upper line and below the lower line) differentially-excreted by > 2-fold

**Table S4. Prenatal imaging data, outcome, infection severity classification, and amniotic fluid analyses in CMV-infected cases included in the Independent Validation cohort**

| Case no. | Imaging findings                                                                                                                                                          | Gestational age at amniocentesis (weeks) | Gestational age at appearance of severe imaging findings (weeks) | Pregnancy outcome | Postnatal follow-up (months) | cCMV severity classification | Proteome analysis | ELISA validation of specific biomarkers |
|----------|---------------------------------------------------------------------------------------------------------------------------------------------------------------------------|------------------------------------------|------------------------------------------------------------------|-------------------|------------------------------|------------------------------|-------------------|-----------------------------------------|
| 407      | US - periventricular hyperechogenicity and cysts, small cerebellum, hyperechogenic bowel                                                                                  | 23                                       | 23                                                               | TOP               | NA                           | SCC                          | -                 | +                                       |
| 181      | US - periventricular hyperechogenicity and cysts, hyperechogenic bowel                                                                                                    | 21                                       | 23                                                               | TOP               | NA                           | SCC                          | -                 | +                                       |
| 758      | US - periventricular hyperechogenicity, intracerebral calcifications                                                                                                      | 27                                       | 23                                                               | TOP               | NA                           | SCC                          | -                 | +                                       |
| 333      | US - porencephalic cyst in the occipital lobe; MRI - occipital and temporal cysts                                                                                         | 22                                       | 28                                                               | TOP               | NA                           | SCC                          | -                 | +                                       |
| 614      | US - periventricular calcifications, head circumference < 2 SD of normal, mild ventriculomegaly, hypoplasia of corpus callosum hyperechogenic bowel, liver calcifications | 21                                       | 16                                                               | TOP               | NA                           | SCC                          | -                 | +                                       |
| 254      | US - periventricular calcifications, intraventricular adhesions                                                                                                           | 22                                       | 29                                                               | TOP               | NA                           | SCC                          | -                 | +                                       |
| 486      | US - intraventricular adhesions, temporal cysts; MRI - bilateral temporal cysts                                                                                           | 22                                       | 31                                                               | TOP               | NA                           | SCC                          | -                 | +                                       |
| IT 1     | US - periventricular hyperechogenicity, head circumference < 2 SD of normal                                                                                               | 20                                       | 21                                                               | TOP               | NA                           | SCC*                         | -                 | +                                       |
| IT 2     | US - periventricular hyperechogenicity, head circumference < 2 SD of normal                                                                                               | 21                                       | 21                                                               | TOP               | NA                           | SCC*                         | -                 | +                                       |
| IT 3     | US - head circumference < 2 SD of normal, periventricular hyperechogenicity, enlarged Cisterna Magna                                                                      | 21                                       | 21                                                               | TOP               | NA                           | SCC*                         | -                 | +                                       |
| IT 4     | US - mild ventriculomegaly, periventricular hyperechogenicity, hyperechogenic bowel                                                                                       | 21                                       | 21                                                               | TOP               | NA                           | SCC*                         | -                 | +                                       |

|       |                                                                                                                |    |    |          |     |      |   |   |
|-------|----------------------------------------------------------------------------------------------------------------|----|----|----------|-----|------|---|---|
| IT 18 | US - periventricular hyperechogenicity, corpus callosum hypoplasia, placentomegaly                             | 21 | 21 | TOP      | NA  | SCC* | - | + |
| IT 20 | US – lissencephaly, head circumference < 2 SD of normal, IUGR                                                  | 21 | 21 | TOP      | NA  | SCC* | - | + |
| IT 21 | US - periventricular hyperechogenicity, lissencephaly                                                          | 21 | 21 | TOP      | NA  | SCC* | - | + |
| IT 22 | US - head circumference < 2 SD of normal, lissencephaly, mild ventriculomegaly                                 | 20 | 20 | TOP      | NA  | SCC* | - | + |
| IT 23 | US - 21w: normal; MRI - 28w: polymicrogyria                                                                    | 21 | 28 | TOP      | NA  | SCC* | - | + |
| IT 29 | MRI - 25w: periventricular cystic lesions; MRI - 30w: intraventricular synechiae, periventricular pseudocystis | 20 | 25 | Delivery | >12 | SCC* | - | + |
| 431   | normal                                                                                                         | 22 | NA | Delivery | >48 | ACC  | - | + |
| 873   | normal                                                                                                         | 23 | NA | Delivery | >36 | ACC  | - | + |
| 408   | normal                                                                                                         | 21 | NA | Delivery | >24 | ACC  | - | + |
| 902   | normal                                                                                                         | 22 | NA | Delivery | >24 | ACC  | - | + |
| 472   | normal                                                                                                         | 22 | NA | Delivery | >36 | ACC  | - | + |
| 943   | normal                                                                                                         | 22 | NA | Delivery | >24 | ACC  | - | + |
| 859   | normal                                                                                                         | 22 | NA | Delivery | >18 | ACC* | - | + |
| IT 5  | normal                                                                                                         | 20 | NA | Delivery | >48 | ACC* | - | + |
| IT 6  | normal                                                                                                         | 20 | NA | Delivery | >36 | ACC* | - | + |
| IT 7  | normal                                                                                                         | 20 | NA | Delivery | >36 | ACC* | - | + |
| IT 8  | normal                                                                                                         | 20 | NA | Delivery | >36 | ACC* | - | + |
| IT 9  | normal                                                                                                         | 20 | NA | Delivery | >24 | ACC* | - | + |
| IT 15 | normal                                                                                                         | 20 | NA | Delivery | >48 | ACC* | - | + |
| IT 16 | normal                                                                                                         | 20 | NA | Delivery | >48 | ACC* | - | + |

|       |        |    |    |          |     |      |   |   |
|-------|--------|----|----|----------|-----|------|---|---|
| IT 17 | normal | 20 | NA | Delivery | >36 | ACC* | - | + |
| IT 19 | normal | 20 | NA | Delivery | >12 | ACC* | - | + |
| IT 27 | normal | 20 | NA | Delivery | >12 | ACC* | - | + |
| IT 28 | normal | 20 | NA | Delivery | >12 | ACC* | - | + |
| IT 30 | normal | 20 | NA | Delivery | >24 | ACC* | - | + |
| 0739  | normal | 22 | NA | Delivery | >36 | ACC* | - | + |
| 6914  | normal | 22 | NA | Delivery | >36 | ACC* | - | + |
| 5886  | normal | 22 | NA | Delivery | >36 | ACC* | - | + |
| 5081  | normal | 22 | NA | Delivery | >36 | ACC* | - | + |
| 6423  | normal | 21 | NA | Delivery | >24 | ACC* | - | + |
| 3408  | normal | 22 | NA | Delivery | >24 | ACC* | - | + |
| 1481  | normal | 22 | NA | Delivery | >18 | ACC* | - | + |

\* Blind Testing

US = ultrasound; MRI = magnetic resonance imaging; SD = standard deviations; IUGR = intrauterine growth restriction; TOP = termination of pregnancy; NA = not applicable; cCMV = congenital cytomegalovirus; SCC = severe congenital CMV infection; ACC = asymptomatic congenital CMV infection

**Table S5. AUC, sensitivity, specificity, and predictive values of chemerin and Gal-3BP amniotic fluid levels in relation to cCMV severity**

|                                  |                           |          | AUC [95% CI]      | Cutoff values (ng/ml)* | Sensitivity (%) | Specificity (%) | PPV (%) | NPV (%) |
|----------------------------------|---------------------------|----------|-------------------|------------------------|-----------------|-----------------|---------|---------|
| <b>Initial Validation cohort</b> | SCC (n=11) vs. ACC (n=15) | Chemerin | 0.988 [0.957-1.0] | 61.1                   | 90.9            | 93.3            | 90.9    | 93.3    |
|                                  |                           | Gal-3BP  | 0.945 [0.855-1.0] | 2501                   | 90.9            | 93.3            | 90.9    | 93.3    |
| <b>Blind Testing cohort</b>      | SCC (n=10) vs. ACC (n=19) | Chemerin | NA                | 61.1                   | 90.0            | 100             | 100     | 95.0    |
|                                  |                           | Gal-3BP  | NA                | 2501                   | 90.0            | 100             | 100     | 95.0    |

\*Defined by ROC analysis of the Initial Validation cohort

AUC = area under the curve; Gal-3BP = Galectin-3-binding-protein; cCMV = congenital cytomegalovirus; SCC = severe congenital CMV infection; ACC = asymptomatic congenital CMV infection; PPV = positive predictive value; NPV = negative predictive value
